# Supplementary material for: Cesium salt of tungstophosphoric acid/mesoporous (zirconia–silica) composite for highly efficient synthesis of 7-hydroxy-4-methyl coumarin and removal of methylene blue
Source: Royal Society of Chemistry journal article supplement (doi:10.1039/d3ra02235h), 2023-01-01
Supplement: d3ra02235h1.pdf [file d3ra02235h1.pdf]

**Cesium salt of tungstophosphoric acid/ mesoporous (zirconia-silica) composite for highly efficient synthesis of 7-hydroxy-4-methyl coumarin and removal of methylene blue**

**Amr Awad Ibrahim<sup>a\*</sup>, Doaa A. Kospa<sup>a</sup>, O. R. Hayes<sup>a</sup>, A. S. Khder<sup>a,b</sup>, S. A. El-Hakam<sup>a</sup>,  
Awad I. Ahmed<sup>a\*</sup>**

<sup>a</sup> Department of Chemistry, Faculty of Science, Mansoura University, Al-Mansoura 35516, Egypt.

<sup>b</sup> Chemistry Department, Faculty of Applied Science, Umm Al-Qura University, 21955 Makkah, Saudi Arabia

Tel.: +220502390551- E-mail: amr\_awad@mans.edu.eg

$$n\lambda = 2d_{100} \sin(\theta) \quad \text{equ S(1)}$$

$$a_0 = 2d_{100}/\sqrt{3} \quad \text{equ S(2)}$$

$$\text{Log } q_e = \text{log } K_F + \frac{1}{n} \text{log } C_e \quad \text{equ S (3)}$$

$$\frac{C_e}{q_e} = \frac{1}{K_L q_{max}} + \frac{C_e}{q_{max}} \quad \text{equ S(4)}$$

Where  $K_F$  and  $n$  denote the Freundlich adsorption constants,  $q_m$  (mg/g) gives the monolayer adsorption capacity of the adsorbent, and  $K_L$  (L/mg) produces the Langmuir adsorption constant.

$$\ln (q_e - q_t) = \ln q_e - k_1 t \quad \text{equ S (5)}$$

$$\frac{t}{q_t} = \frac{1}{k_2 q_e^2} + \frac{1}{q_e} t \quad \text{equ S (6)}$$

Where the rate constants for the pseudo-first and pseudo-second order processes are  $k_1$  ( $\text{hr}^{-1}$ ), and  $k_2$  (g/mg hr) are the rate constants for pseudo-first order and pseudo-second order reactions, respectively.

$$F = 1 - (6/\pi^2) \exp(-Bt) \quad \text{equ S(7)}$$

$$B = \pi D/ r^2 = \text{time constant} \quad \text{equ S(8)}$$

$r$  is the adsorbent particle radius, which is expected to be spherical, and  $F$  is the fraction of solute adsorbed at various times  $t$ , that  $D$  is the effective diffusion coefficient of the adsorbate in the adsorbent phase.

$$F = q_t/q_e \quad \text{equ S(9)}$$

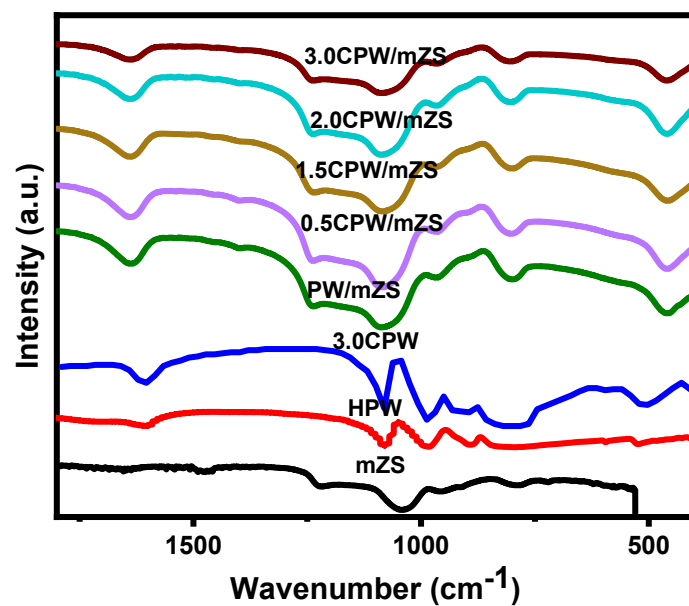

**Fig. S1:** FT-IR spectra of mZS, HPW, 3.0CPW, PW/mZS, and  $C_{S_x}H_{3-x}PW_{12}O_{40}/mZS$  samples from 1800- 400  $cm^{-1}$ .

| Adsorbents                                                                   | C <sub>0</sub> (MB)<br>(mg/L) | Dye removal<br>(%) | Adsorption capacity<br>Q <sub>max</sub> (mg/g) | References       |
|------------------------------------------------------------------------------|-------------------------------|--------------------|------------------------------------------------|------------------|
| Silk fibroin–graphene oxide<br>(SF/GO)                                       | 100                           | 96.0               | 381.7                                          | 1                |
| Micro-mesoporous silica<br>(MMZ)                                             | 100                           | 91.0               | 303.1                                          | 2                |
| 12-tungstophosphoric<br>acid/Zr/MCM-41 (25.0 wt%<br>PTA/Zr-MCM-41)           | --                            | --                 | 259.1                                          | 3                |
| 2-amino-5-guanidinopentanoic<br>acid modified activated carbon<br>(AGDPA@AC) | 60                            | 75.0               | 219.9                                          | 4                |
| Lysine and EDA double cross-<br>linked graphene aerogel<br>(LEGA)            | 150                           | 97.5               | 332.2                                          | 5                |
| H <sub>3</sub> PO <sub>4</sub> -modified corn stalks (P-<br>CSs)             | 90                            | 91.0               | 129.2                                          | 6                |
| V <sub>2</sub> CT <sub>x</sub> MXene                                         | 50                            | 94.8               | 111.1                                          | 7                |
| nanosheet MFI zeolite (NZ)                                                   | ---                           | ---                | 476.2                                          | 8                |
| Fava bean peels (FBP)                                                        | 50                            | 90.0               | 140.1                                          | 9                |
| Fe-BDC MOF                                                                   | 5                             | 94.7               | 8.6                                            | 10               |
| CuO loaded Activated Carbon                                                  | 50                            | 99.2               | 10.5                                           | 11               |
| <b>3.0 CPW/mZs</b>                                                           | <b>100</b>                    | <b>99.7</b>        | <b>359.8</b>                                   | <b>This work</b> |

**Table. S(1):** Comparison study for removal of MB in other catalysts reported in the literature with this work.

1. L. J. Martis, N. Parushuram and Y. Sangappa, *Environ. Sci.: Adv.*, 2022, **1**, 285-296.

2. F. Subhan, S. Aslam, Z. Yan, M. Yaseen, M. Naeem, M. Ikram, A. Ali and S. Bibi, *Inorg Chem Commun*, 2022, **139**, 109380.
3. A. A. Ibrahim, R. S. Salama, S. A. El-Hakam, A. S. Khder and A. I. Ahmed, *Colloids and Surfaces A: Physicochemical and Engineering Aspects*, 2021, DOI: 10.1016/j.colsurfa.2021.127753, 127753.
4. M. Naushad, A. A. Alqadami, Z. A. AlOthman, I. H. Alsohaimi, M. S. Algamdi and A. M. Aldawsari, *J Mol Liq*, 2019, **293**, 111442.
5. L. Jiang, Y. Wen, Z. Zhu, X. Liu and W. Shao, *Chemosphere*, 2020, **265**, 129169.
6. Y. Tang, Y. Zhao, T. Lin, Y. Li, R. Zhou and Y. Peng, *Journal of Environmental Chemical Engineering*, 2019, **7**, 103398.
7. H. Lei, Z. Hao, K. Chen, Y. Chen, J. Zhang, Z. Hu, Y. Song, P. Rao and Q. Huang, *J Phys Chem Lett*, 2020, **11**, 4253-4260.
8. Y. Ji, F. Xu, W. Wei, H. Gao, K. Zhang, G. Zhang, Y. Xu and P. Zhang, *J Solid State Chem*, 2021, **295**, 121917.
9. O. S. Bayomie, H. Kandeel, T. Shoeib, H. Yang, N. Youssef and M. M. H. El-Sayed, *Sci Rep*, 2020, **10**, 7824.
10. C. Arora, S. Soni, S. Sahu, J. Mittal, P. Kumar and P. K. Bajpai, *J Mol Liq*, 2019, **284**, 343-352.
11. M. Ghaedi, A. M. Ghaedi, M. Hossainpour, A. Ansari, M. H. Habibi and A. R. Asghari, *Journal of Industrial and Engineering Chemistry*, 2014, **20**, 1641-1649.
